# Supplementary material
Source: Springer Nature journal article supplement (https://www.springermedizin.de/resource/supplementary/12890_2014_647_MOESM2_ESM.pdf/9505454)
Supplement: MOESM2 [file 9505454]

**Screened**  
n=115

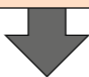

**Randomized**  
n=62

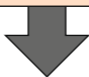

**Completed study**  
n=58 (93.5%)

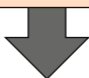

**Completed treatment**  
n=58 (93.5%)

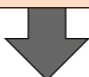

**Discontinued**  
n=4 (6.5%)

*Withdrawal by patient: n=2 (3.2%)*

*Other: n=2 (3.2%)*

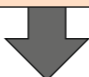

**Intention-to-treat population: n=62**  
**Safety population: n=62**  
**Per-protocol population: n=61**
